# Supplementary material for: Effect of pressure on the electronic structure of antiferromagnetic and paramagnetic YNiO3: the role of disproportionation
Source: Royal Society of Chemistry journal article supplement (doi:10.1039/d2cp05618f), 2023-01-01
Supplement: d2cp05618f1.pdf [file d2cp05618f1.pdf]

1

2

## Supporting Information

3

for

4

# Effect of pressure on the electronic structure of antiferromagnetic and paramagnetic $\text{YNiO}_3$ : role of disproportionation

5

6

7

Mateusz Wlazło and Oleksandr I. Malyi\*

8

ENSEMBLE<sup>3</sup> Centre of Excellence, Wolczynska 133, 01-919 Warsaw, Poland

10 \*Email: [oleksandrmalyi@gmail.com](mailto:oleksandrmalyi@gmail.com)

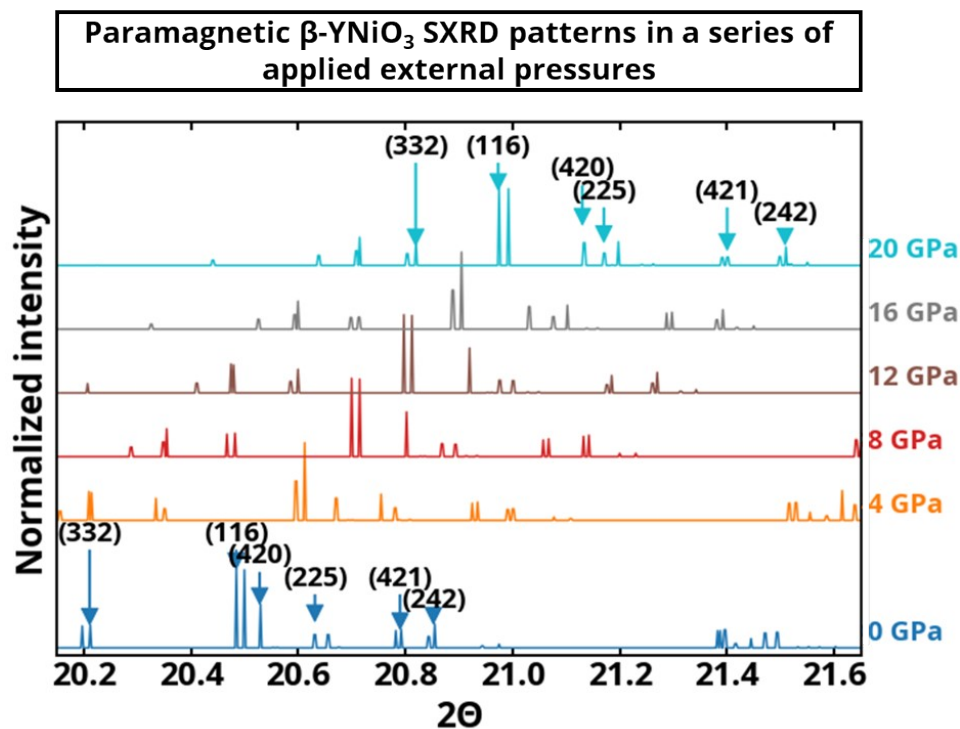

12  
 13 **Figure S1.** Synchrotron X-ray diffraction (SXR D) spectra of the simulated beta (paramagnetic) phase of YNiO<sub>3</sub> at  
 14 ambient (0 GPa) and series of elevated pressures up to 20 GPa. The  $2\theta$ -scan diffractograms were computed  
 15 assuming X-ray radiation source of  $\lambda=0.4166$  Å corresponding to the beamline used in the referenced SXR D  
 16 study of García-Muñoz et al.<sup>1</sup> For comparison with experiment the SXR D spectra are presented after reducing  
 17 the polymorphous cell to the primitive cell neglecting small distribution of local structural motifs.

## DOS and IDOS projected on large and small NiO<sub>6</sub> octahedra

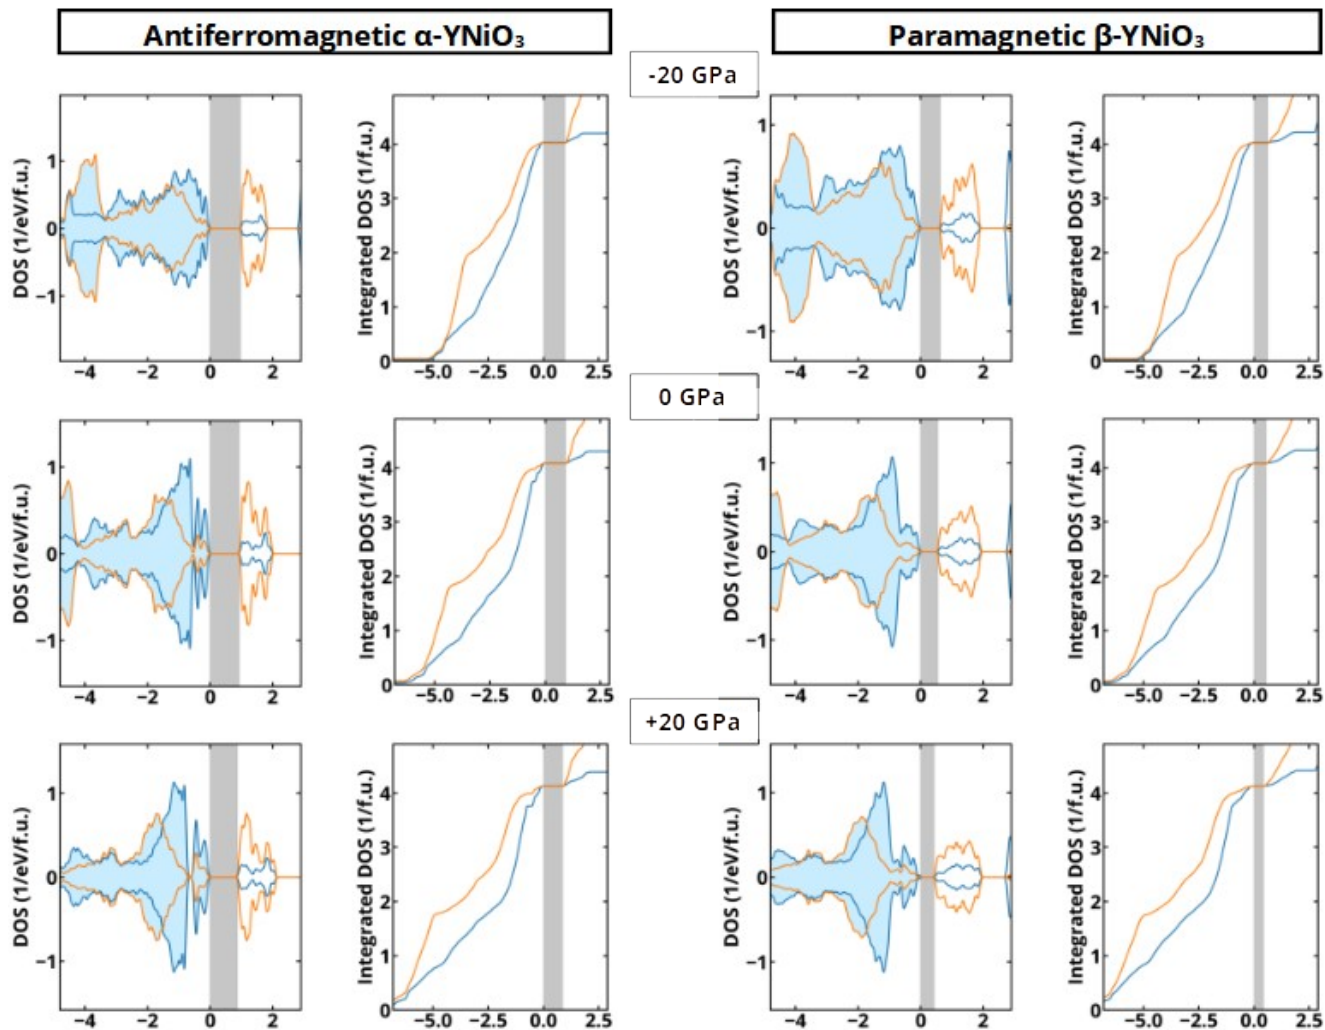

18

19 **Figure S2.** Ni-d density of states and integrated density of states with distinction between nickels in the center  
20 of large and small octahedra at ambient (0 GPa), elevated (+20 GPa), and decreased (-20 GPa) pressures.

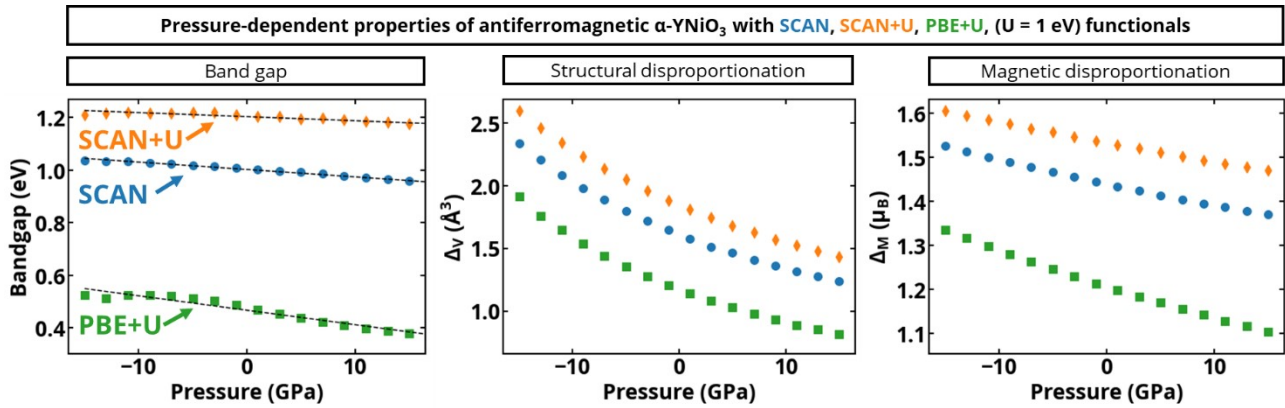

22

23 **Figure S3.** The pressure dependence of the electronic band gap and the two disproportionation factors present  
 24 in the  $\alpha$ -YNiO<sub>3</sub> system with different density functionals. Blue circles (labeled SCAN) correspond to the “SCAN,  
 25 no U” results presented in Figure 2 and Figure 3 in the main text. Orange diamonds (labeled SCAN+U) have been  
 26 obtained by applying the Hubbard U = 1 eV correction to Ni-d states using the Dudarev method<sup>2</sup>. Green squares  
 27 (labeled PBE+U) have used the Perdew-Burke-Ernzerhof<sup>3</sup> functional with the same U correction.

28

## 29 References

- 30 1. J. L. García-Muñoz, M. Amboage, M. Hanfland, J. A. Alonso, M. J. Martínez-Lope and R.  
 31 Mortimer, *Physical Review B*, 2004, **69**.  
 32 2. S. L. Dudarev, G. A. Botton, S. Y. Savrasov, C. J. Humphreys and A. P. Sutton, *Physical Review B*,  
 33 1998, **57**, 1505-1509.  
 34 3. J. P. Perdew, K. Burke and M. Ernzerhof, *Phys Rev Lett*, 1996, **77**, 3865-3868.  
 35
